# Supplementary material for: La modificación cualificada de planeamiento urbano y función consultiva
Source: Royal Society of Chemistry journal article supplement (doi:10.1039/d0nr03007d), 1997-01-01
Supplement: d0nr03007d1.pdf [file d0nr03007d1.pdf]

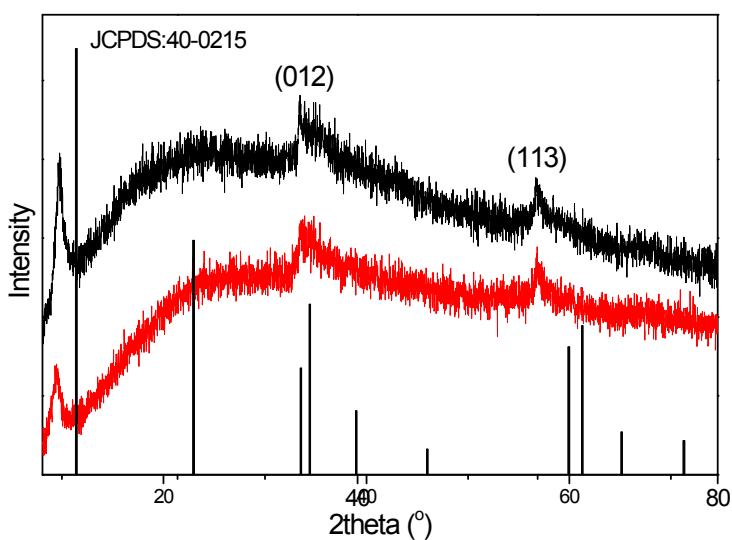

Figure S1 XRD pattern of NFLS and Pd-NFLS and the standard curve of  $\text{Ni}_{0.75}\text{Fe}_{0.25}(\text{CO}_3)_{0.125}(\text{OH})_2 \cdot 0.38\text{H}_2\text{O}$  (JCPDS: 40-0215). Upper curve was for Pd-NFLS and lower curve for NFLS. Vertical bar was for the standard XRD pattern.

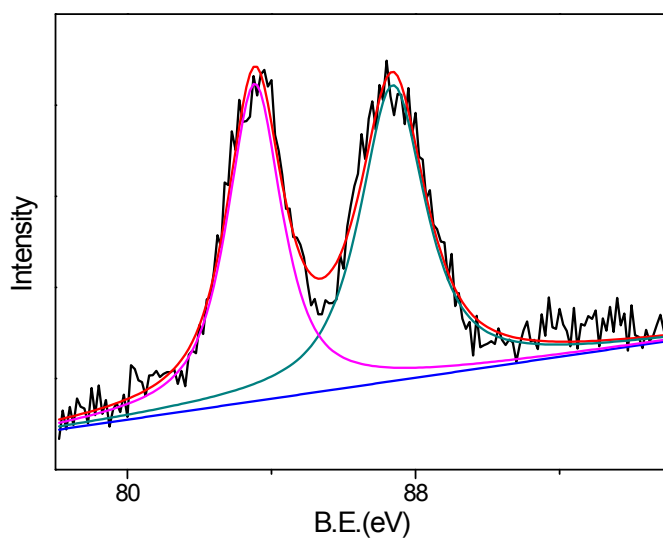

Figure S2 XPS pattern of Au 3d on Au-NFLS showed the zero valence of noble metal.

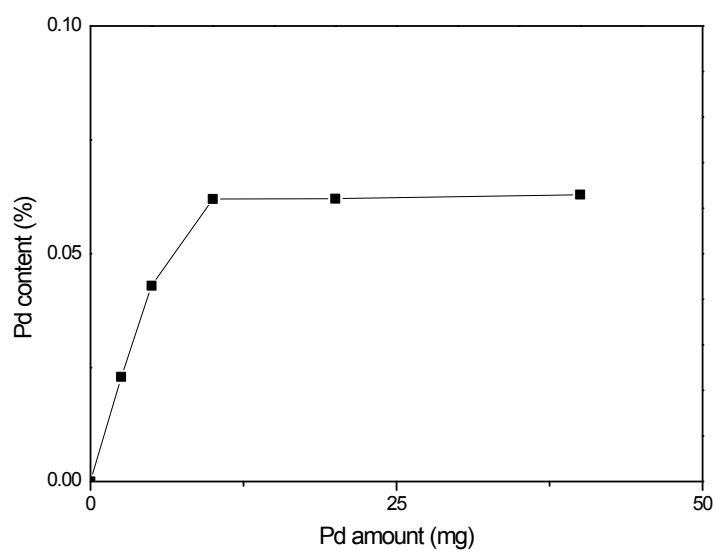

Figure S3. The content of Pd in Pd-NFLS in the different compose of soaking reactions conducted by ICP-MS. NFLS amount: 50 mg. Soaking time: 20 min.

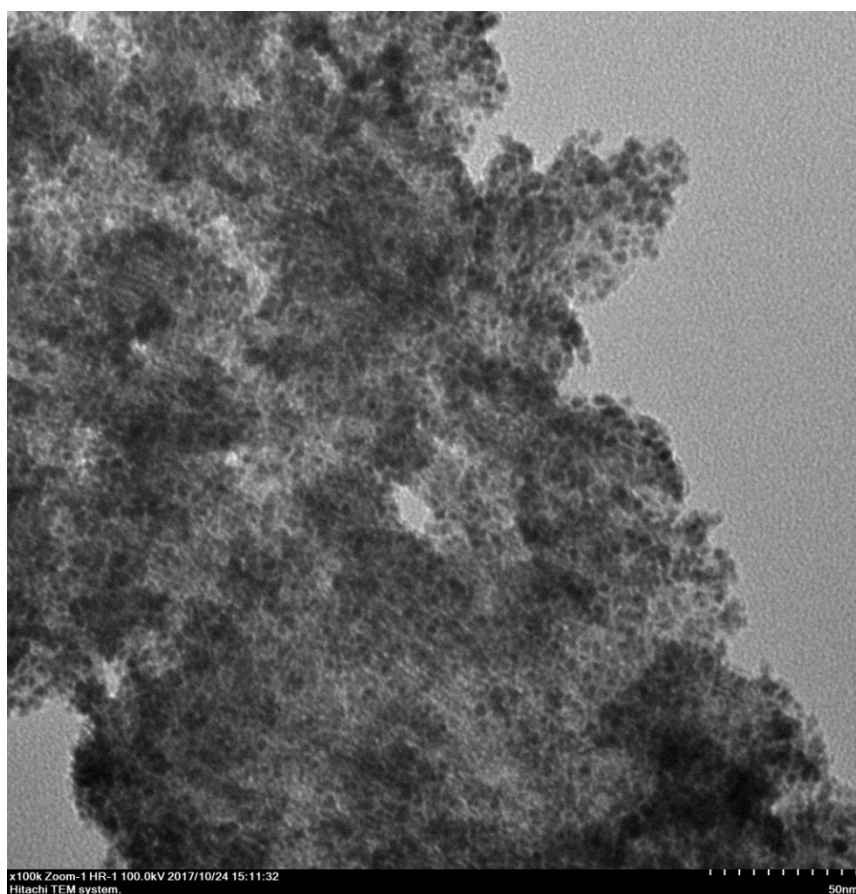

Figure S4 TEM image of Pd-NFLS with excess amount (>50 mg) of Pd resource. Pd nanoparticles were out of NFLS laminar and diameter of Pd nanoparticles was 5~10 nm.

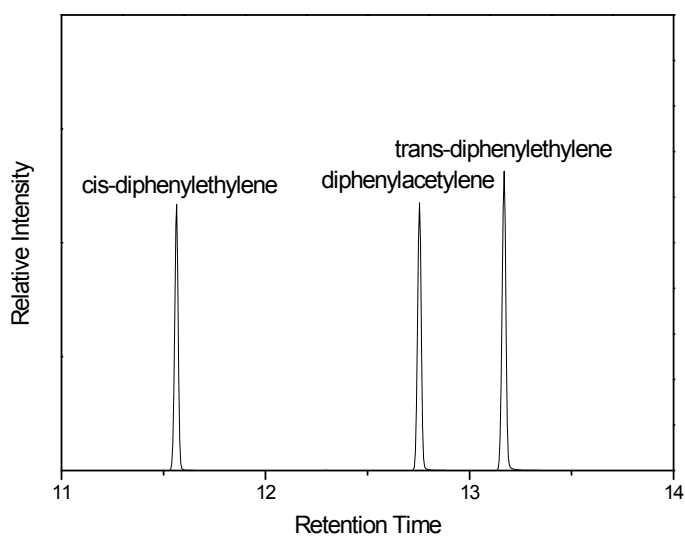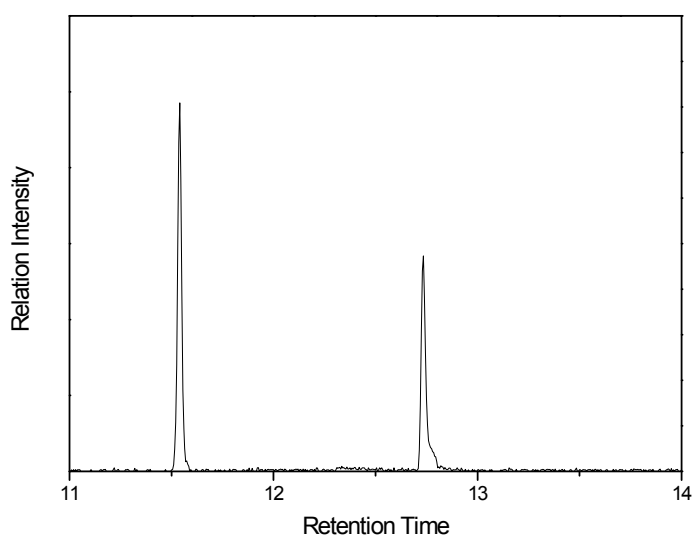

Figure S5. (a)The GC-MS pattern of the mixture of diphenylacetylene, cis-1,2-diphenylethylene and trans-1,2-diphenylethylene.

The concentration of those three reagents are equal, thus the peak area can be used to calculate the amount of each component in catalysis process. (b) A typical GC-MS pattern of semihydrogenation. Pd-NFLS works as catalyst in these reactions. No trans- product appears in the GC-MS pattern, which reveals excellent stereoselectivity of PD-NFLS catalyst.

GC-MS was carried out on Thermo Scientific DSQ GC/MS (QP2010, Shimadzu). 50  $\mu$ l product was dispersed in 950  $\mu$ l ethanol and He was used as carrier gas.

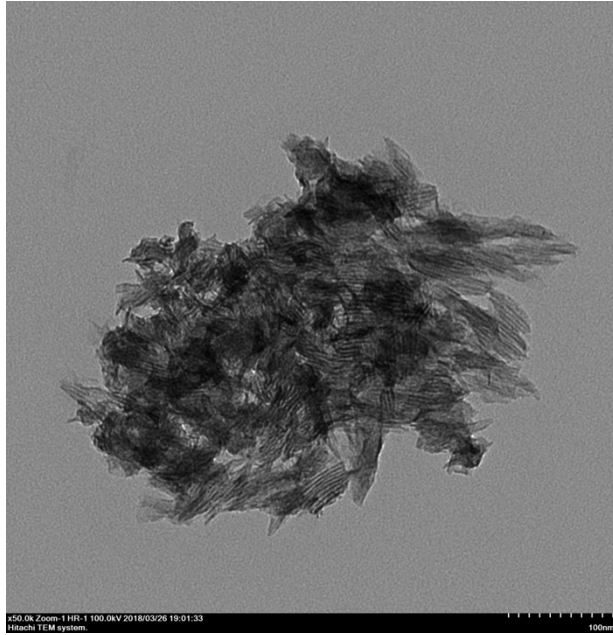

Figure S6 TEM image of Pd-NFLS after catalyst process still remain the periodic laminar structure.

Table S1 Catalytic performances of other reported semihydrogenation catalysts

| Catalyst                               | Sub. <sup>a</sup>        | Temp. <sup>b</sup> | Red. <sup>c</sup>        | Conv. <sup>d</sup> | TON <sup>e</sup>     | Ref.                         |
|----------------------------------------|--------------------------|--------------------|--------------------------|--------------------|----------------------|------------------------------|
| Au NPs                                 | Phenylacetylene et al.   | 80 °C              | H <sub>2</sub> (g)       | ~99%               | 5000 h <sup>-1</sup> | 10.1021/acscatal.6b03441     |
| Au <sub>25</sub> clusters              | Phenylacetylene et al.   | 100 °C             | H <sub>2</sub> (g)       | ~99%               |                      | 10.1021/ja503724j            |
| Au@CeO <sub>2</sub>                    | Phenylacetylene          | Rt.                | H <sub>2</sub> (g)       | ~99%               |                      | 10.1021/jacs.5b07521         |
| Cu/SiO <sub>2</sub>                    | Diphenylacetylene et al. | 60 °C              | H <sub>2</sub> (g)       | ~99%               |                      | 10.1021/jacs.6b10817         |
| Au <sub>x</sub> AgNPore                | Diphenylacetylene et al. | 90 °C              | H <sub>2</sub> (g)       | 86%                |                      | 10.1021/jacs.6b06569         |
| PdNPore                                | Diphenylacetylene et al. | Rt.                | H <sub>2</sub> (g)       | 90%                |                      | 10.1021/acscatal.7b02915     |
| PdIn/MgAl <sub>2</sub> O <sub>4</sub>  | Phenylacetylene          | 90 °C              | H <sub>2</sub> (g)       | 97%                |                      | 10.1021/jacs.7b01471         |
| Pd-MDPC                                | 1-octyne                 | Rt.                | H <sub>2</sub> (g)       | 62%                |                      | 10.1002/cctc.201501283       |
| Ni SAs                                 | Acetylene                | Rt.                | H <sub>2</sub> (g)       | 90%                |                      | 10.1039/c7cc04820c           |
| Pd@Ru Ns                               | 1-octyne                 | Rt.                | H <sub>2</sub> (g)       | 81%                |                      | 10.1002/adma.201604829       |
| Pd <sub>1</sub> /ND@G                  | acetylene                | 180 °C             | H <sub>2</sub> (g)       | 90%                | 230 h <sup>-1</sup>  | 10.1021/jacs.8b07476         |
| Pd-POM                                 | Diphenylacetylene        | Rt.                | PhMe <sub>2</sub> SiH    | 91%                | 2000 h <sup>-1</sup> | 10.1039/C5SC03554F           |
| Pd-Pb NCs                              | Diphenylacetylene        | Rt.                | H <sub>2</sub> (g)       | 96%                |                      | 10.1002/anie.201503148       |
| Pd <sup>0</sup> -AmP-HSN               | Phenylacetylene          | Rt.                | H <sub>2</sub> (g)       | 95%                |                      | 10.1002/cctc.201501112       |
| Co(PDI)                                | 4-phenyl-1-butene        | 40 °C              | (EtO) <sub>2</sub> MeSiH | 97%                |                      | 10.1021/acscatal.6b02272     |
| Cu(OAc) <sub>2</sub> ·H <sub>2</sub> O | 1-phenyl-1-allylene      | Rt.                | PhMe <sub>2</sub> SiH    | 80%                |                      | 10.1002/adsc.201200200       |
| Pd/Zn-Ti                               | Phenylacetylene          | 45 °C              | H <sub>2</sub> (g)       | 93%                |                      | 10.1016/j.apsusc.2018.06.091 |
| pre-NiCu/MMO                           | Phenylacetylene          | 100 °C             | H <sub>2</sub> (g)       | 86%                |                      | 10.1016/j.jcat.2018.01.009   |
| NiMgGaLDH                              | Phenylacetylene          | 50 °C              | H <sub>2</sub> (g)       | 80%                |                      | 10.1002/cctc.201300813       |

a Sub., substrate. b Temp., temperature. c Red., reductant. d Conv., conversion (from alkyne to alkene). e TON, turnover number.

Table S2 Selective hydrogenation of different  $\alpha,\beta$ -unsaturated aldehydes by different kinds of LDH based nanoreactors.

| Entry                     | Catalysts | Reductants           | Time (h) | Conv. (%)* | Selectivity (%) ** |      |      |
|---------------------------|-----------|----------------------|----------|------------|--------------------|------|------|
|                           |           |                      |          |            | A                  | B    | C    |
| Substrate: cinnamaldehyde |           |                      |          |            |                    |      |      |
| 1                         | Pd-NFLS   | NaBH <sub>4</sub>    | 8        | 98.1       | 94.5               | 0    | 5.5  |
| 2                         | Au-NFLS   | NaBH <sub>4</sub>    | 8        | 43.1       | 83.0               | 1.7  | 15.3 |
| 3                         | Pt-NFLS   | NaBH <sub>4</sub>    | 8        | 69.7       | 82.1               | 7.5  | 10.4 |
| 4                         | Pd NPs    | NaBH <sub>4</sub>    | 8        | 37.8       | 56.3               | 7.4  | 36.3 |
| 5                         | Pd-NFLS   | PhSiHMe <sub>2</sub> | 24       | 46.7       | 18.6               | 24.7 | 56.7 |
| 6                         | Au-NFLS   | PhSiHMe <sub>2</sub> | 24       | 47.5       | 22.2               | 37.0 | 40.8 |
| 7                         | Pt-NFLS   | PhSiHMe <sub>2</sub> | 24       | 94.8       | 1.5                | 84.3 | 14.2 |
| 8                         | Pd NPs    | PhSiHMe <sub>2</sub> | 24       | 7.8        | 17.7               | 19.6 | 62.7 |
| 9                         | NFLS      | NaBH <sub>4</sub>    | 8        | 0          | 0                  | 0    | 0    |
| 10                        | NFLS      | PhSiHMe <sub>2</sub> | 24       | 0          | 0                  | 0    | 0    |
| Substrate: furfural       |           |                      |          |            |                    |      |      |
| 11                        | Pd-NFLS   | NaBH <sub>4</sub>    | 1        | 98.5       | 100                | 0    | 0    |

|                               |         |                   |    |      |      |     |     |
|-------------------------------|---------|-------------------|----|------|------|-----|-----|
| 12                            | Au-NFLS | NaBH <sub>4</sub> | 1  | 96.1 | 100  | 0   | 0   |
| 13                            | Pt-NFLS | NaBH <sub>4</sub> | 1  | 94.9 | 100  | 0   | 0   |
| Substrate: 3-methyl-2-butenal |         |                   |    |      |      |     |     |
| 14                            | Pd-NFLS | NaBH <sub>4</sub> | 16 | 54.3 | 94.2 | 2.3 | 3.5 |
| 15                            | Au-NFLS | NaBH <sub>4</sub> | 16 | 31.2 | 88.2 | 3.9 | 7.9 |
| 16                            | Pt-NFLS | NaBH <sub>4</sub> | 16 | 34.6 | 90.1 | 2.1 | 7.8 |

---

\*Conv., conversion. Conversion of substrates and selectivity for specific products were tested by gas chromatography-mass spectrometry

\*\* Selectivity, A,  $\alpha,\beta$ -unsaturated alcohol; B, saturated aldehyde; C, saturated alcohol.
